# Supplementary material
Source: Elsevier journal article supplement (https://www.sciencedirect.com/science/article/pii/S0210569117302012)
Supplement: mmc1 [file S0210569117302012:mmc1.doc]

***Tabla-1***. Datos de las características clínicas y asistenciales del paciente, según el estilo Utstein.

|  | **SEM** | Desconocía ritmo cardiaco inicial.  Indicó instrucciones de RCP por teléfono. | |
| --- | --- | --- | --- |
| **Características del paciente** | Género | Masculino | |
| Edad (años) | 39 | |
| PCR presenciada | Si | |
| Localización de la PCR | Domicilio | |
| Testigo | No personal sanitario | |
| Primer ritmo cardiaco monitorizado | Fibrilación Ventricular | |
| Patogénesis | IMEST | |
| Situación Basal | Independiente para cualquier actividad | |
| Presencia de comorbilidades | No | |
| DAV | No | |
| DAI | No | |
| Presencia de IMEST | Si | |
| **Proceso de la PCR** | Tiempo (min) transcurrido desde el evento hasta:   - PCR presenciada - Llamar a emergencias: Establecer RCP básica (sólo compresiones) - Establecer RCP básica (ventilación y compresiones) - Llegada SVA; DESA - Llegada SVA; Monitor Desfibrilable - Primera recuperación circulación espontánea - Estabilidad Hemodinámica | | - 1 - 3 - 15 - 20 - 35 - 39 - 40 |
| Primera desfibrilación (min) | - 21 | |
| Inicio de hipotermia | Tras RCE, en hospital | |
| Fármacos administrados | Adrenalina 1 mg  Adrenalina 2 mg  Amiodarona 600 mg  Midazolam 10 mg | |
| **Procesos PCR suplementarios** | Aislamiento de vía aérea | Intubación orotraqueal prehospitalaria a los 23 minutos de PCR | |
| Tipo de Ventilación | Manual en domicilio  Mecánica en hospital | |
| Acceso Vascular | Vía venosa periférica | |
| Drogas administradas (min)   - Adrenalina 1 mg - Adrenalina 2 mg - Amiodarona 600 mg - Midazolam 10 mg | | - 23 - 37 - 37 - 37 |
| Calidad de RCP | Desconocida previa la llegada del SEM.  De calidad a partir de la llegada del SEM | |
| Tipo de RCP | Manual, no dispositivos automáticos | |
| Ritmo Cardiaco   - Primera lectura (DESA) - Segunda lectura (DESA) - Tercera lectura (DESA) - Cuarta lectura (DESA) - Quinta lectura (Monitor Desfibrilable) - Sexta lectura (Monitor Desfibrilable) | | - Fibrilación Ventricular - Ritmo no Desfibrilable - Ritmo no Desfibrilable - Ritmo no Desfibrilable - Fibrilación Ventricular - Fibrilación Ventricular |
| Indicación de Desfibrilación   - Fibrilación Ventricular (DESA) - Ritmo no Desfibrilable (DESA) - Ritmo no Desfibrilable (DESA) - Ritmo no Desfibrilable (DESA) - Fibrilación Ventricular (Monitor Desfibrilable) - Fibrilación Ventricular (Monitor Desfibrilable) | | - 21 - 23 - 25 - 27 - 37 - 39 |
| Glasgow a la llegada del equipo de emergencia | | - 3 |
| **Proceso tras RCP a su llegada al Hospital** | Tipo de Hospital | Hospital especialista de tercer nivel | |
| Test sanguíneo a la llegada al hospital   - pH - Ácido Láctico (mmol/l) - PaCO2 (mmHg) - PaO2 (mmHg) - Creatinina plasmática (mg/dl) - Troponinas cardiacas (ng/dl) | | - 6.99 - 5.0 - 92 - 37 - 1.2 - 9.8 |
| Electrocardiograma a su llegada al Hospital: Supradesnivelación segmento ST (mm)   - V3 - V4 - aVL | | - 6 - 6 - 2 |
| Ecocardiografía a su llegada al Hospital | Disfunción Sistólica Severa del Ventrículo Izquierdo | |
| Cateterismo Coronario a su llegada al Hospital | Trombo en descendente anterior proximal, extraído con implante de stent farmacoactivo posterior, sin ninguna otra lesión a nivel del árbol coronario. | |
| **Resultado** | Supervivencia al evento | Si | |
| RCE en algún momento | Si | |
| Supervivencia a los 30 días de la primera descarga eléctrica | Si | |
| Resultados neurológicos según CPC | 1 | |
| **Resultados adicionales** | Supervivencia a los 12 meses | Si | |
| Recurrencias del evento | No | |
| Muerte | No | |
| Donación de órganos | No | |
| Evaluación de patología cardiológica residual | No. Ergometría con realización de 21 METS | |
| Calidad de vida al año | Independiente para actividades físicas, ausencia de secuelas neurológicas (CPC – 1) | |

*CPC: Cerebral Performance Category; DAI: Desfibrilador Automático Implantable; DAV: Dispositivo de Asistencia Ventricular; IMEST: Infarto de Miocardio con elevación del segmento ST; RCE: Recuperación de Circulación Espontánea; RCP: Reanimación Cardiopulmonar; PCR: Parada Cardiorrespiratoria; SEM: Servicio de Emergencias Médicas.*
